# Supplementary material for: Symptoms of Anxiety, Depression, and Post-Traumatic Stress Disorder in Health Care Personnel in Norwegian ICUs during the First Wave of the COVID-19 Pandemic, a Prospective, Observational Cross-Sectional Study
Source: MDPI journal article supplement (doi:10.3390/ijerph19127010), 2022-06-08
Supplement: s1 [file s1]

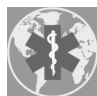

Article

# Symptoms of Anxiety, Depression, and Post-Traumatic Stress Disorder in Health Care Personnel in Norwegian ICUs during the First Wave of the COVID-19 Pandemic, a Prospective, Observational Cross-Sectional Study

Siv K Stafseth<sup>1,2\*</sup>, Laila Skogstad<sup>3</sup>, Johan Raeder<sup>4,5</sup>, Ingvild Strand Hovland<sup>6</sup>, Haakon Hovde<sup>7</sup>, Øivind Ekeberg<sup>8</sup> and Irene Lie<sup>9,10</sup>

Department of Postoperative and Intensive care, Division of Emergencies and Critical Care, Oslo University Hospital, Oslo, Norway

<sup>2</sup> Lovisenberg Diaconal University College, Oslo, Norway

<sup>3</sup> Department of Health and Care Sciences, Faculty of Health Sciences, UiT The Arctic University of Norway, Tromsø, Norway

<sup>4</sup> Department of Anaesthesiology, Division of Emergencies and Critical Care, Oslo University Hospital, Oslo, Norway

<sup>5</sup> Institute of Clinical Medicine, University of Oslo, Norway

<sup>6</sup> Department of Acute medicine, Division of Medicine, Oslo University Hospital, Oslo, Norway

<sup>7</sup> The Norwegian Association for critical care nurses, Oslo, Norway

<sup>8</sup> Psychosomatic and Consultation-Liaison psychiatry, Division of Mental Health and Addiction, Oslo University Hospital, Oslo, Norway

<sup>9</sup> Centre for Patient-Centered Heart and Lung Research, Department of Cardiothoracic surgery, Division of Cardiovascular and Pulmonary Diseases, Oslo University Hospital, Oslo, Norway

<sup>10</sup> Department of Health Sciences in Gjøvik, Faculty of Medicine and Health Sciences, Norwegian University of Science and Technology, Gjøvik, Norway

\* Correspondence: sistaf@ous-hf.no

## Questionnaire PART IV-VII

### Healthcare professionals' experiences with COVID-19 patients in intensive care units in Norway (Part IV-VII)

#### Reference ID

- The field is filled in automatically

Thank you for taking the time to share your views and experiences working with COVID-ICU patients.

## Part IV: CORONAVIRUS AND SOCIAL CONTACT

Who have you been afraid of infecting?

*Choose all that apply*

- Patients
- Colleagues
- Family in own household or other family members
- Friends
- Not applicable

How would you describe your limited social contact?

|                                                     | Not at all            | To a small degree     | Partly                | To a high degree      | To a very high degree |
|-----------------------------------------------------|-----------------------|-----------------------|-----------------------|-----------------------|-----------------------|
| Felt isolated                                       | <input type="radio"/> |
| Felt lonely                                         | <input type="radio"/> |
| No problem                                          | <input type="radio"/> |
| Increased contact within own household              | <input type="radio"/> |
| Increased contact via social media, telephone, work | <input type="radio"/> |

How have you had social contact outside working hours?

Choose all that apply.

- ☐ Social media like Facebook
- ☐ Talked to colleague(s) by phone
- ☐ Communicated with friends, family on SKYPE, Facetime, etc.
- ☐ Met with others, but only outdoors with social distancing and masks
- ☐ Met with a limited number of people indoors with masks and social distancing
- ☐ Met with others indoors, one to several times beyond recommendation from the Norwegian Institute of Public Health (NIPH) (number of people, social distancing)

#### Part V: ASSESSMENT OF INDIVIDUAL WORK EFFORT AND SUPPORT MEASURES

To what extent are you professionally satisfied with the following aspects of your work?

|                         | Not at all            | To a small degree     | Partly                | To a high degree      | To a very high degree |
|-------------------------|-----------------------|-----------------------|-----------------------|-----------------------|-----------------------|
| Your own effort         | <input type="radio"/> |
| Your closest partners   | <input type="radio"/> |
| Your department         | <input type="radio"/> |
| Your organization       | <input type="radio"/> |
| Responsible authorities | <input type="radio"/> |

Assessment of proficiency during work in the COVID-ICU

|                                                                                             | Not at all            | To a small degree     | Partly                | To a high degree      | To a very high degree |
|---------------------------------------------------------------------------------------------|-----------------------|-----------------------|-----------------------|-----------------------|-----------------------|
| To what extent do you think that the work you participate / participated in was successful? | <input type="radio"/> |

|                                                                                                                                                                          |                       |                       |                       |                       |                       |
|--------------------------------------------------------------------------------------------------------------------------------------------------------------------------|-----------------------|-----------------------|-----------------------|-----------------------|-----------------------|
| To what extent do you think that the work you participate / participated in was meaningful?                                                                              | <input type="radio"/> |
| To what extent do / did you experience falling short of the work tasks to be performed?                                                                                  | <input type="radio"/> |
| To what extent do / did you experience that you were impeded in the work you or your team had to perform (e.g. due to bureaucracy, lack of equipment, unclear messages?) | <input type="radio"/> |
| Did you receive sufficient advice and support at work?                                                                                                                   | <input type="radio"/> |
| Did you overextend yourself because great effort was expected of your team, leader or colleagues (e.g. did not take breaks, worked more than you really could, etc.)?    | <input type="radio"/> |

#### Recognition and support during the pandemic

|                                                                                                                                         | Not at all            | To a small degree     | Partly                | To a high degree      | To a very high degree |
|-----------------------------------------------------------------------------------------------------------------------------------------|-----------------------|-----------------------|-----------------------|-----------------------|-----------------------|
| To what extent have your efforts been appreciated by your hospital?                                                                     | <input type="radio"/> |
| To what extent have your family / friends given you recognition for your professional and personal efforts?                             | <input type="radio"/> |
| To what extent have you experienced that the authorities have recognized the work your professional group has done during the pandemic? | <input type="radio"/> |

Does / did your employer have any kinds of support measures in place during the COVID-ICU effort?

Choose all that apply

- ☐ No special support measures
- ☐ Yes, group meetings where experiences could be shared (debriefing, defusing, etc.)
- ☐ Yes, professional support measure (psychologist, psychiatrist, psychiatric nurse, chaplain, minister, etc.)
- ☐ Information about support measures was provided
- ☐ I declined support talks
- ☐ Support by phone (e.g. from work environment)
- ☐ Follow-up by manager following completed shifts

- Other

Are there other elements at work that have seemed supportive? (Choose all that apply.)

- Talking to a colleague
- Talking to a manager
- Professional information
- Daily briefing
- Not applicable

Have you considered quitting your job as a result of the pandemic?

- No
- Yes, sometimes
- Yes, often
- Yes, specifically planning to quit / have already resigned

### Part VI: REACTIONS TO EXPERIENCES AND ECONOMY

Below is a list of issues that may be reactions to highly stressful events such as the COVID-19 pandemic.

Please indicate whether any experiences related to the COVID-19 pandemic have been stressful for you by answering each question.

Have you experienced any of the following issues during the last month?

|                                                                                                                                                           | Not at all            | A little bit          | Moderately            | Quite a bit           | Extremely             |
|-----------------------------------------------------------------------------------------------------------------------------------------------------------|-----------------------|-----------------------|-----------------------|-----------------------|-----------------------|
| Repeated, disturbing, and unwanted memories of the stressful experiences of the pandemic?                                                                 | <input type="radio"/> |
| Repeated, disturbing dreams of the stressful experience of the pandemic?                                                                                  | <input type="radio"/> |
| No problem Suddenly feeling or acting as if the stressful experience were actually happening again (as if you were actually back there reliving it)?      | <input type="radio"/> |
| Feeling very upset when something reminded you of the stressful experience of the pandemic?                                                               | <input type="radio"/> |
| Having strong physical reactions when something reminded you of the stressful experience of the pandemic?                                                 | <input type="radio"/> |
| Avoiding memories, thoughts, or feelings related to the stressful experience of the pandemic?                                                             | <input type="radio"/> |
| Avoiding external reminders of the stressful experience of the pandemic (for example, people, places, conversations, activities, objects, or situations)? | <input type="radio"/> |

|                                                                                                                                                                                                                                    |                       |                       |                       |                       |                       |
|------------------------------------------------------------------------------------------------------------------------------------------------------------------------------------------------------------------------------------|-----------------------|-----------------------|-----------------------|-----------------------|-----------------------|
| Trouble remembering important parts of the stressful experience of the pandemic?                                                                                                                                                   | <input type="radio"/> |
| Having strong negative beliefs about yourself, other people, or the world ( for example, having thoughts such as: I am bad, there is something seriously wrong with me, no one can be trusted, the world is completely dangerous)? | <input type="radio"/> |
| Blaming yourself or someone else for the pandemic?                                                                                                                                                                                 | <input type="radio"/> |
| Having strong negative feelings such as fear, horror, anger, guilt, or shame?                                                                                                                                                      | <input type="radio"/> |
| Loss of interest in activities that you used to enjoy?                                                                                                                                                                             | <input type="radio"/> |
| Feeling distant or cut off from other people?                                                                                                                                                                                      | <input type="radio"/> |
| Trouble experiencing positive feelings (for example, being unable to feel happiness or have loving feelings for people close to you)?                                                                                              | <input type="radio"/> |
| Irritable behavior, angry outbursts, or acting aggressively?                                                                                                                                                                       | <input type="radio"/> |
| Taking too many risks or doing things that could cause you harm?                                                                                                                                                                   | <input type="radio"/> |
| Being “superalert” or watchful or on guard?                                                                                                                                                                                        | <input type="radio"/> |
| Feeling jumpy or easily startled?                                                                                                                                                                                                  | <input type="radio"/> |
| Having difficulty concentrating?                                                                                                                                                                                                   | <input type="radio"/> |
| Trouble falling or staying asleep?                                                                                                                                                                                                 | <input type="radio"/> |

Have you experienced any of these during the last week (including today)?

|                                                  | Not bothered          | A little              | Quite a bit           | Very much bothered    |
|--------------------------------------------------|-----------------------|-----------------------|-----------------------|-----------------------|
| Suddenly scared for no reason                    | <input type="radio"/> | <input type="radio"/> | <input type="radio"/> | <input type="radio"/> |
| Feeling fearful                                  | <input type="radio"/> | <input type="radio"/> | <input type="radio"/> | <input type="radio"/> |
| Faintness, dizziness or weakness                 | <input type="radio"/> | <input type="radio"/> | <input type="radio"/> | <input type="radio"/> |
| Feeling tense or keyed up                        | <input type="radio"/> | <input type="radio"/> | <input type="radio"/> | <input type="radio"/> |
| Blaming yourself for things                      | <input type="radio"/> | <input type="radio"/> | <input type="radio"/> | <input type="radio"/> |
| Difficulties in falling asleep or staying asleep | <input type="radio"/> | <input type="radio"/> | <input type="radio"/> | <input type="radio"/> |

|                                   |                       |                       |                       |                       |
|-----------------------------------|-----------------------|-----------------------|-----------------------|-----------------------|
| Feeling blue                      | <input type="radio"/> | <input type="radio"/> | <input type="radio"/> | <input type="radio"/> |
| Feelings of worthlessness         | <input type="radio"/> | <input type="radio"/> | <input type="radio"/> | <input type="radio"/> |
| Feeling everything is a effort    | <input type="radio"/> | <input type="radio"/> | <input type="radio"/> | <input type="radio"/> |
| Feeling hopeless about the future | <input type="radio"/> | <input type="radio"/> | <input type="radio"/> | <input type="radio"/> |

Have you used one or more of the following medications as a result of your COVID-ICU work during the pandemic?

|                        | Never                 | Sometimes             | Weekly                | Daily                 |
|------------------------|-----------------------|-----------------------|-----------------------|-----------------------|
| Sleep medications      | <input type="radio"/> | <input type="radio"/> | <input type="radio"/> | <input type="radio"/> |
| Sedatives              | <input type="radio"/> | <input type="radio"/> | <input type="radio"/> | <input type="radio"/> |
| Anxiolytic medications | <input type="radio"/> | <input type="radio"/> | <input type="radio"/> | <input type="radio"/> |
| Antidepressants        | <input type="radio"/> | <input type="radio"/> | <input type="radio"/> | <input type="radio"/> |
| Other medications      | <input type="radio"/> | <input type="radio"/> | <input type="radio"/> | <input type="radio"/> |

Have you used alcohol as a result of your COVID-ICU work during the pandemic?

|                                               | No                    | Yes, the first week   | Yes, for more than a week |
|-----------------------------------------------|-----------------------|-----------------------|---------------------------|
| To calm you down                              | <input type="radio"/> | <input type="radio"/> | <input type="radio"/>     |
| As a mood enhancer                            | <input type="radio"/> | <input type="radio"/> | <input type="radio"/>     |
| To sleep                                      | <input type="radio"/> | <input type="radio"/> | <input type="radio"/>     |
| Used more alcohol than you normally do        | <input type="radio"/> | <input type="radio"/> | <input type="radio"/>     |
| Used about as much alcohol as you normally do | <input type="radio"/> | <input type="radio"/> | <input type="radio"/>     |
| Used less alcohol than you normally do        | <input type="radio"/> | <input type="radio"/> | <input type="radio"/>     |

Have you previously had symptoms of anxiety?

- ☐ Yes
- ☐ No

Have you previously had symptoms of depression?

- ☐ Yes
- ☐ No

How has the COVID-19 pandemic affected your finances?

- ☐ Improved
- ☐ Unchanged
- ☐ Worsened

#### Part VII: FINAL QUESTIONS

|                                                                                              | Not at all            | To a small degree     | Partly                | To a high degree      | To a very high degree |
|----------------------------------------------------------------------------------------------|-----------------------|-----------------------|-----------------------|-----------------------|-----------------------|
| To what extent are you more prepared to cope with a future pandemic?                         | <input type="radio"/> |
| To what extent do you better understand the reactions of others after the COVID-19 pandemic? | <input type="radio"/> |

Thank you so much for taking the time to respond to this survey! Your participation is greatly appreciated, and we are extremely grateful for your contribution to this research on the experiences of healthcare personnel working in COVID-ICUs in Norway.

You have received a copy of the consent form in your digital mailbox and can register your consent via the consent portal: [portal.tsd.usit.no/](https://portal.tsd.usit.no/)

<https://nettskjema.no/user/form/preview.html?id=147356#/> Page 29 of 29 rc1)

#### Table S1 and Table S2, Results of univariate quantile regression analyses

**Table S1.** Results of univariate quantile regression analysis of factors predicting probable mental health disorder (HSCL-10  $\geq 1.85$ ).

| Exploratory variables<br>Estimates (q=0.5)                   | Coefficient    | Standard Error   | 95%CI                          | t              | p              |
|--------------------------------------------------------------|----------------|------------------|--------------------------------|----------------|----------------|
| Age<br>R 2 0.086                                             | -0.16          | 0.0063           | -0.028, -0.003                 | -2.464         | 0.017          |
| Sex<br>R 2 0.086                                             | 0.003          | 0.1670           | -0.332, 0.332                  | 0.019          | 0.985          |
| Married/ partner<br>Children in household<br>R 2 0.160       | 0.100<br>0.000 | 0.4372<br>0.4646 | -0.777, 0.977<br>-0.932, 0.932 | 0.229<br>0.000 | 0.820<br>1.000 |
| Professional Nurse<br>Physician<br>R 2 0.006                 | 0.000<br>0.100 | 0.4360<br>0.5057 | -0.874, 0.874<br>-0.914, 1.114 | 0.000<br>0.198 | 1.000<br>0.844 |
| Previous work experience (<5 years)<br>>6 years<br>R 2 0.104 | 0.400<br>0.200 | 0.1509<br>0.2310 | 0.097, 0.703<br>-0.263, 0.663  | 2.650<br>0.866 | 0.011<br>0.391 |

CI=Confidence intervals, R 2=Pseudo R square.

**Table S2.** Results of univariate quantile regression analysis of symptom-defined PTSD  $n=31$  (PCL-5  $\geq 31$ ).

| Exploratory variables<br>Estimates (q=0.5)                      | Coefficient     | Standard<br>Error  | 95%CI                              | t               | p              |
|-----------------------------------------------------------------|-----------------|--------------------|------------------------------------|-----------------|----------------|
| Age<br>R 2 0.010                                                | -0.063          | 0.2168             | -0.506, 0.381                      | -0.288          | 0.775          |
| Sex<br>R 2 0.011                                                | -2.000          | 4.2836             | -10.761, 6.761                     | 0.467           | 0.644          |
| Married/ partner<br>Children in household<br>R 2 0.040          | 4.000<br>1.000  | 10.1551<br>11.5147 | -16.802, 24.802<br>-22.587, 24.587 | 0.394<br>0.087  | 0.697<br>0.931 |
| Professional Nurse<br>Physician<br>R 2 0.017                    | -1.000<br>1.000 | 7.2988<br>12.2132  | -15.951, 13.951<br>-24.018, 26.018 | -0.137<br>0.082 | 0.892<br>0.935 |
| Previous work experience (<5<br>years)<br>>6 years<br>R 2 0.034 | -3.000<br>2.000 | 6.3069<br>3.7787   | -15.919, 9.919<br>-5.740, 9.740    | -0.476<br>0.529 | 0.638<br>0.601 |

CI=Confidence intervals, R 2=Pseudo R square.

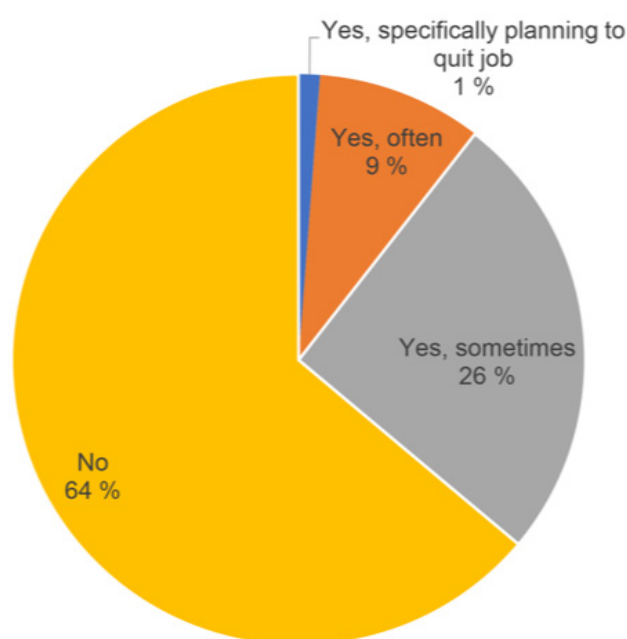**Figure S1.** Results of the answer to "Have you considered quitting your job as a result of the pandemic?" (N=484).
